# Supplementary material
Source: MDPI journal article supplement (https://www.mdpi.com/2079-6412/9/3/203)
Supplement: s1 [file s1]

# Supplementary Materials: Silicon Phthalocyanines as Acceptor Candidates in Mixed Solution/Evaporation Processed Planar Heterojunction Organic Photovoltaic Devices

Marie D. M. Faure, Trevor M. Grant<sup>1</sup> and Benoît H. Lessard \*

Department of Chemical Engineering, University of Ottawa, 161 Louis Pasteur, Ottawa, ON K1N 6N5, Canada; mfaur031@uottawa.ca (M.D.M.F.); tgran079@uottawa.ca (T.M.G.)

\* Correspondence: benoit.lessard@uottawa.ca

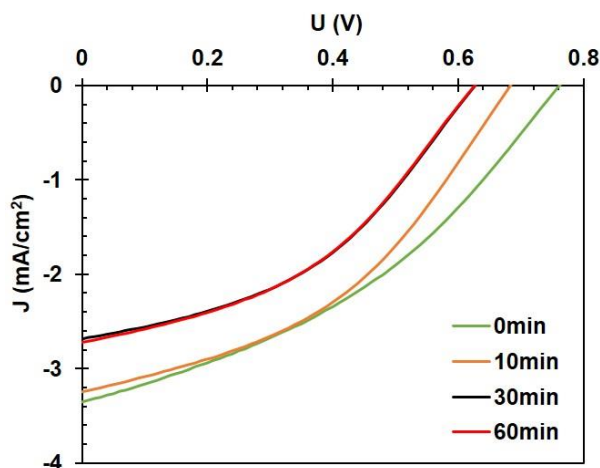

**Figure S1.** Characteristic current vs. voltage (J-V) for PHJ OPV devices where the active layer is PCDTBT/(345F)<sub>2</sub>-SiPc (50 nm) and where the PCDTBT layer have been annealed at 150 °C for 0, 10, 30 and 60 min.

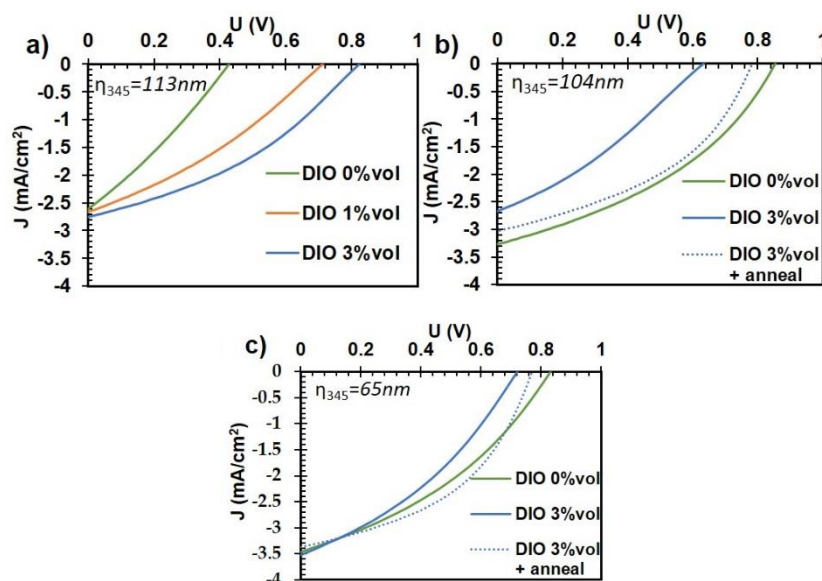

**Figure 2.** Characteristic current vs. voltage (J-V) for PHJ PCDTBT/(345F)<sub>2</sub>-SiPc devices with a SiPc thickness of **(a)** 113nm with incorporated DIO in the PCDTBT layer at 0, 1 and 3 vol %, **(b)** 104 nm and **(c)** 65 nm where DIO have been incorporated in the PCDTBT layer at 0, 3 and 3 vol % followed by annealing at 100 °C for 15 min.

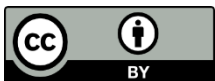

© 2019 by the authors. Licensee MDPI, Basel, Switzerland. This article is an open access article distributed under the terms and conditions of the Creative Commons Attribution (CC BY) license (<http://creativecommons.org/licenses/by/4.0/>).
